# Supplementary material for: Design and Optimize the Performance of Self-Powered Photodetector Based on PbS/TiS3 Heterostructure by SCAPS-1D
Source: MDPI journal article supplement (doi:10.3390/nano12030325), 2022-01-20
Supplement: s1 [file s1]

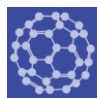

Supporting Information

# Design and Optimize the Performance of Self-Powered Photodetector Based on PbS/TiS<sub>3</sub> Heterostructure by SCAPS-1D

Huizhen Yao and Lai Liu \*

Key Laboratory of Instrumentation Science and Dynamic Measurement, Ministry of Education, School of Instrument and Electronics, North University of China, Taiyuan 030051, China; huizhenyao@126.com

\* Correspondence: liulaiopto@163.com

## Supplementary Materials:

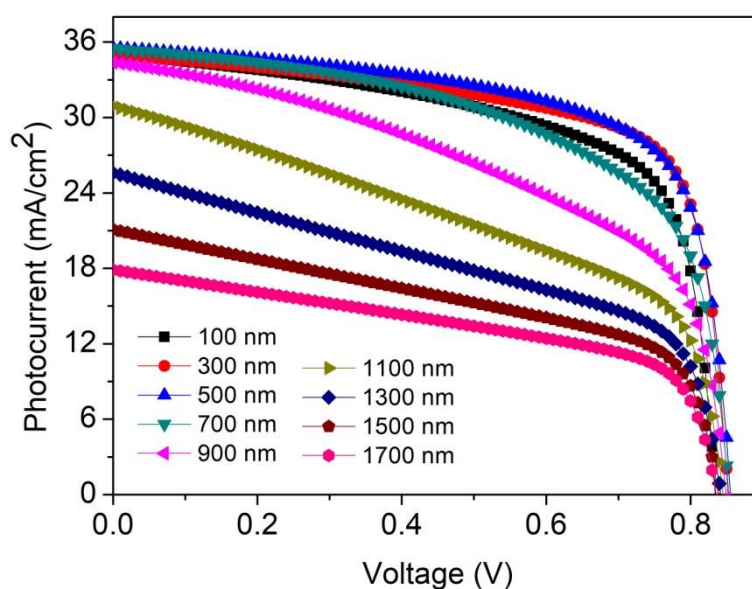

**Figure S1.** J–V characteristic curves for varying the PbS layer thickness with constant optimized TiS<sub>3</sub> layer at 2.5  $\mu\text{m}$ .

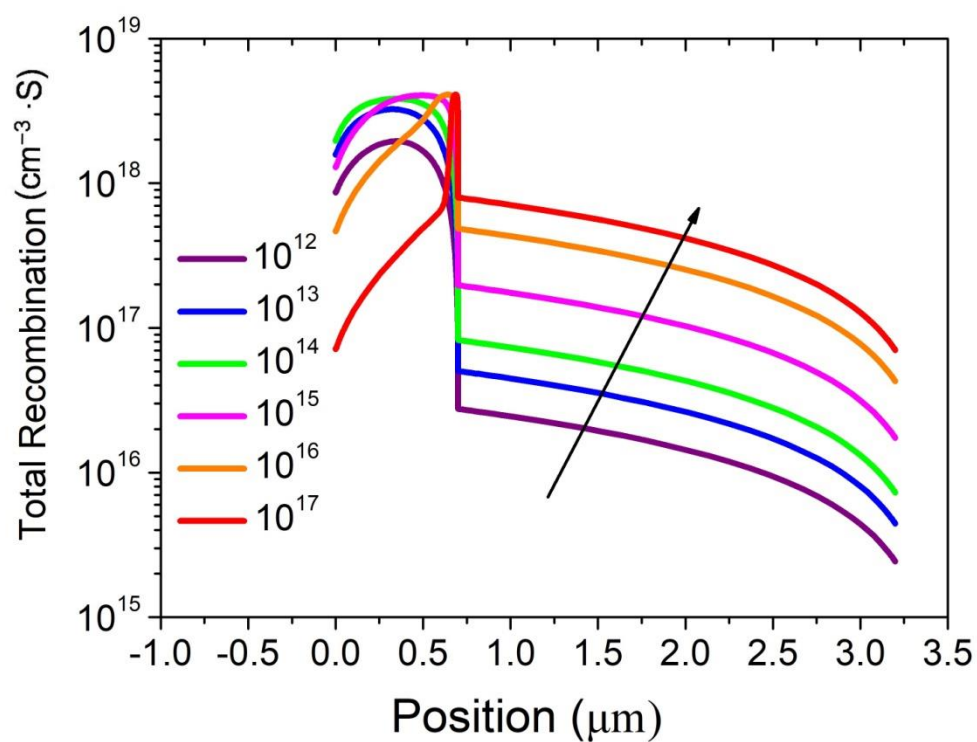

**Figure S2.** Total recombination of photo carriers in the  $\text{TiS}_3$ -base photodetector with varied shallow acceptor density of PbS layer.

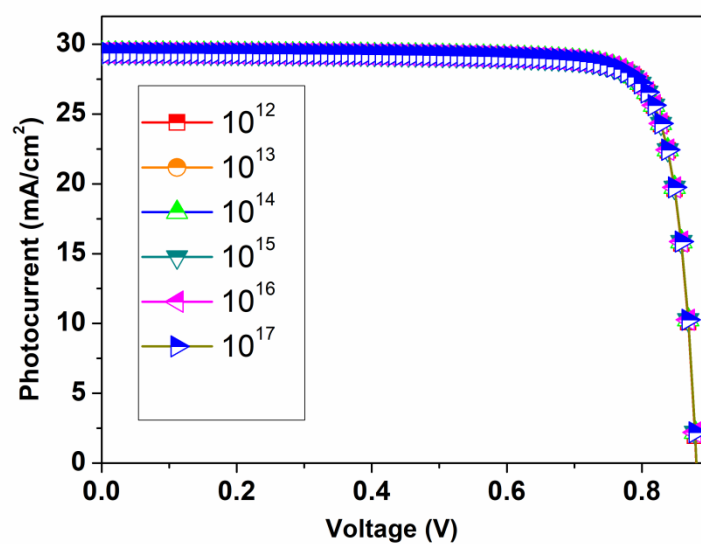

**Figure S3.** J-V characteristic curves for varying the PbS defect density from  $10^{12}$  to  $10^{17} \text{ cm}^{-3}$ .

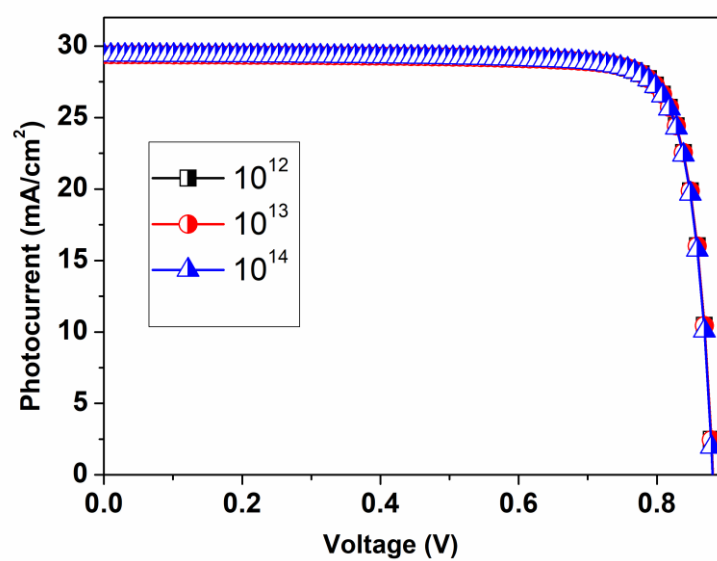

Figure S4. J-V characteristic curves for varying the  $\text{TiS}_3$  defect density from  $10^{12}$  to  $10^{14} \text{ cm}^{-3}$ .

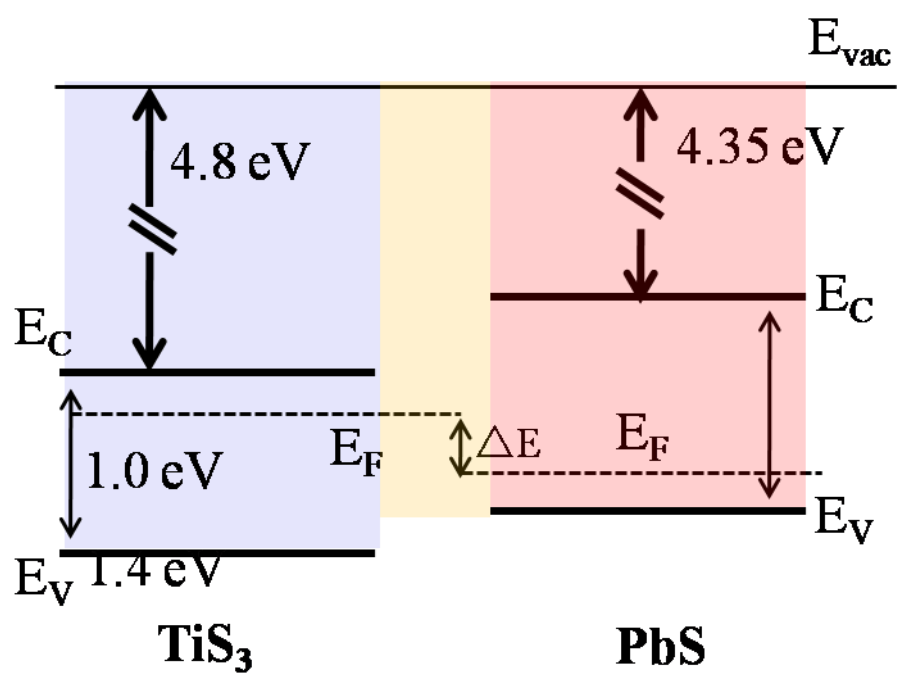

Figure S5. Schematic band diagram before  $\text{TiS}_3$  and  $\text{PbS}$  contacting.
